# Supplementary material for: Histological Subtypes Drive Distinct Prognostic Immune Signatures in Classical Hodgkin Lymphoma
Source: MDPI journal article supplement (doi:10.3390/cancers14194893), 2022-10-06
Supplement: s1 [file s1]

# Supplementary material: Histological subtypes drive distinct prognostic immune signatures in classical Hodgkin lymphoma.

Claire Lamaison, Juliette Ferrant, Pauline Gravelle, Alexandra Traverse-Glehen, Hervé Ghesquières, Marie Tosolini, Cédric Rossi, Loic Ysebaert, Pierre Brousset, Camille Laurent and Charlotte Syrykh

**Table S1.** List of immune related genes included in the Immunology V2 panel, with Panel Plus.

|           |         |         |                           |          |
|-----------|---------|---------|---------------------------|----------|
| ABCB1     | IRF1    | IFIH1   | CCBP2                     | EGR1     |
| ABL1      | IRF3    | IFIT2   | CCRL1                     | EGR2     |
| ADA       | IRF4    | IFITM1  | CD97                      | ENTPD1   |
| AHR       | IRF5    | IFNA2   | IL28A                     | EOMES    |
| AICDA     | IRF7    | IFNAR1  | IL29                      | ETS1     |
| AIRE      | IRF8    | IFNAR2  | IL8                       | FADD     |
| APP       | IRGM    | IFNB1   | KIR_Inhibiting_Subgroup_2 | FAS      |
| ARG1      | ITGA2B  | IFNG    | C4A/B                     | FCAR     |
| ARG2      | ITGA4   | IFNGR1  | CTLA4-TM                  | FCER1A   |
| ARHGDIB   | ITGA5   | IGF2R   | CD45R0                    | FCER1G   |
| ATG10     | ITGA6   | IKBKAP  | FCGR3A/B                  | FCGR2A   |
| ATG12     | ITGAE   | IKBKB   | CTLA4_all                 | FCGR2B   |
| ATG16L1   | ITGAL   | IKBKE   | FCGR2A/C                  | MAPK1    |
| ATG5      | ITGAM   | IKBKG   | KIR_Activating_Subgroup_2 | MAPK11   |
| ATG7      | ITGAX   | IKZF1   | KIR_Inhibiting_Subgroup_1 | MAPK14   |
| ATM       | ITGB1   | IKZF2   | IFNA1/13                  | MAPKAPK2 |
| B2M       | ITGB2   | IKZF3   | KIR_Activating_Subgroup_1 | MARCO    |
| B3GAT1    | ITLN1   | IL10    | IL28A/B                   | MASP1    |
| BATF      | ITLN2   | IL10RA  | PTPRC_all                 | MASP2    |
| BATF3     | JAK1    | IL11RA  | CD45RB                    | MBL2     |
| BAX       | JAK2    | IL12A   | sCTLA4                    | MBP      |
| BCAP31    | JAK3    | IL12B   | CD45RA                    | MCL1     |
| BCL10     | KCNJ2   | IL12RB1 | FCGR1A/B                  | MIF      |
| BCL2      | KIR3DL1 | IL13    | CD247                     | MME      |
| BCL2L11   | KIR3DL2 | IL13RA1 | CD27                      | MR1      |
| BCL3      | KIR3DL3 | IL15    | CD274                     | MRC1     |
| BCL6      | KIT     | IL16    | CD276                     | MS4A1    |
| BID       | KLRAP1  | IL17A   | CD28                      | MSR1     |
| BLNK      | KLRB1   | IL17B   | CD34                      | MUC1     |
| BST1      | KLRC1   | IL17F   | CD36                      | MX1      |
| BST2      | KLRC2   | IL18    | CD3D                      | MYD88    |
| BTK       | KLRC3   | IL18R1  | CD3E                      | NCAM1    |
| BTLA      | KLRC4   | IL18RAP | CD3EAP                    | NCF4     |
| C14orf166 | KLRD1   | IL19    | CD4                       | NCR1     |
| C1QA      | KLRF1   | IL1A    | CD40                      | NFATC1   |
| C1QB      | KLRF2   | IL1B    | CD40LG                    | NFATC2   |
| C1QBP     | KLRG1   | IL1R1   | CD44                      | NFATC3   |
| C1R       | KLRG2   | IL1R2   | CD46                      | NFIL3    |
| C1S       | KLRK1   | IL1RAP  | CD48                      | NFKB1    |
| C2        | LAG3    | IL1RL1  | CD5                       | NFKB2    |
| C3        | LAIR1   | IL1RL2  | CD53                      | NFKBIA   |
| C4BPA     | LAMP3   | IL1RN   | CD55                      | NFKBIZ   |
| C5        | LCK     | IL2     | CD58                      | NLRP3    |
| C6        | LCP2    | IL20    | CD59                      | NOD1     |
| C7        | LEF1    | IL21    | CD6                       | NOD2     |
| C8A       | LGALS1  | IL21R   | CD7                       | NOS2     |

|        |          |           |         |          |
|--------|----------|-----------|---------|----------|
| C8B    | LGALS3   | IL22      | CD70    | NOTCH1   |
| C8G    | LIF      | IL22RA2   | CD74    | NOTCH2   |
| C9     | LILRA1   | STAT6     | CD79A   | NT5E     |
| CAMP   | LILRA2   | SYK       | CD79B   | PAX5     |
| CARD9  | LILRA3   | TAGAP     | CD80    | PDCD1    |
| CASP1  | LILRA4   | TAL1      | CD81    | PDCD1LG2 |
| CASP10 | LILRA5   | TAP1      | CD82    | PDCD2    |
| CASP2  | LILRA6   | TAP2      | CD83    | PDGFB    |
| CASP3  | LILRB1   | TAPBP     | CD86    | PDGFRB   |
| CASP8  | LILRB2   | TBK1      | CD8A    | PECAM1   |
| CCL11  | LILRB3   | TBX21     | CD8B    | PIGR     |
| CCL13  | LILRB4   | TCF4      | CD9     | PLA2G2A  |
| CCL15  | LILRB5   | TCF7      | CD96    | PLA2G2E  |
| CCL16  | LITAF    | TFRC      | CD99    | PLAU     |
| CCL18  | LTA      | TGFB1     | CDH5    | PLAUR    |
| CCL19  | LTB4R    | TGFB1     | CDKN1A  | PML      |
| CCL2   | LTB4R2   | TGFBR1    | CEACAM1 | POU2F2   |
| CCL20  | LTBR     | TGFBR2    | CEACAM6 | PPARG    |
| CCL22  | LTF      | THY1      | CEACAM8 | PPBP     |
| CCL23  | LY96     | TICAM1    | CEBPB   | PRDM1    |
| CCL24  | MAF      | TIGIT     | CFB     | PRF1     |
| CCL26  | MALT1    | TIMP1     | CFD     | PRKCD    |
| CCL3   | MAP4K1   | TIRAP     | CFH     | PSMB10   |
| CCL4   | MAP4K2   | TLR1      | CFI     | PSMB5    |
| CCL5   | MAP4K4   | TLR2      | CFP     | PSMB7    |
| CCL7   | FCGRT    | TLR3      | CHUK    | PSMB8    |
| CCL8   | FKBP5    | TLR4      | CIITA   | PSMB9    |
| CCND3  | FN1      | TLR5      | CISH    | PSMC2    |
| CCR1   | FOXP3    | TLR7      | CLEC4A  | PSMD7    |
| CCR10  | FYN      | TLR8      | CLEC4E  | PTAFR    |
| CCR2   | GATA3    | TLR9      | CLEC5A  | PTGER4   |
| CCR5   | GBP1     | TMEM173   | CLEC6A  | PTGS2    |
| CCR6   | GBP5     | TNF       | CLEC7A  | PTK2     |
| CCR7   | GDF15    | TNFAIP3   | CLU     | PTPN2    |
| CCR8   | GFI1     | TNFAIP6   | CMKLR1  | PTPN22   |
| CCRL2  | GNLY     | TNFRSF10C | CR1     | PTPN6    |
| CD14   | GP1BB    | TNFRSF11A | CR2     | PVR      |
| CD160  | GPI      | TNFRSF13B | CRADD   | PYCARD   |
| CD163  | GPR183   | TNFRSF13C | CSF1    | RAF1     |
| CD164  | GZMA     | TNFRSF14  | CSF1R   | RAG1     |
| CD19   | GZMB     | TNFRSF17  | CSF2    | RAG2     |
| CD1A   | GZMK     | TNFRSF1B  | CSF2RB  | RARRES3  |
| CD1D   | HAMP     | TNFRSF4   | CSF3R   | RELA     |
| CD2    | HAVCR2   | TNFRSF8   | CTNNB1  | RELB     |
| CD209  | HFE      | TNFRSF9   | CTSC    | RORC     |
| CD22   | HGF      | TNFSF10   | CTSG    | RUNX1    |
| CD24   | HLA-A    | TNFSF11   | CTSS    | S100A8   |
| CD244  | HLA-B    | TNFSF12   | CUL9    | S100A9   |
| IL23A  | HLA-C    | TNFSF13B  | CX3CL1  | S1PR1    |
| IL23R  | HLA-DMA  | TNFSF15   | CX3CR1  | SELE     |
| IL26   | HLA-DMB  | TNFSF4    | CXCL1   | SELL     |
| IL27   | HLA-DOB  | TNFSF8    | CXCL10  | SELPLG   |
| IL2RA  | HLA-DPA1 | TOLLIP    | CXCL11  | SERPING1 |
| IL2RB  | HLA-DPB1 | TP53      | CXCL12  | SH2D1A   |
| IL2RG  | HLA-DQA1 | TRAF1     | CXCL13  | SIGIRR   |
| IL3    | HLA-DQB1 | TRAF2     | CXCL2   | SKI      |

|       |          |        |          |        |
|-------|----------|--------|----------|--------|
| IL32  | HLA-DRA  | TRAF3  | CXCL9    | SLAMF1 |
| IL4   | HLA-DRB1 | TRAF4  | CXCR1    | SLAMF6 |
| IL4R  | HLA-DRB3 | TRAF5  | CXCR2    | SLAMF7 |
| IL5   | HRAS     | TRAF6  | CXCR3    | SLC2A1 |
| IL6   | ICAM1    | TYK2   | CXCR4    | SMAD3  |
| IL6R  | ICAM2    | UBE2L3 | CXCR6    | SMAD5  |
| IL6ST | ICAM3    | VCAM1  | CYBB     | SOCS1  |
| IL7   | ICAM4    | VEGFA  | DEFB1    | SOCS3  |
| IL7R  | ICAM5    | VTN    | DEFB103A | SPP1   |
| IL9   | ICOS     | XBP1   | DEFB103B | SRC    |
| ILF3  | ICOSLG   | XCL1   | DEFB4A   | STAT1  |
| IRAK1 | IDO1     | XCR1   | DPP4     | STAT2  |
| IRAK2 | IDO2     | ZAP70  | DUSP4    | STAT3  |
| IRAK3 | IFI16    | ZBTB16 | EBI3     | STAT4  |
| IRAK4 | IFI35    | ZEB1   | EDNRB    | STAT5A |
|       |          |        |          | STAT5B |

**Table S2.** Differentially expressed genes between paired diagnostic and relapse samples of classical Hodgkin lymphoma patients.

| Global diagnosis signature |             |                 |           |           |
|----------------------------|-------------|-----------------|-----------|-----------|
| Genes                      | Fold.Change | Log.Fold.Change | p.Value   | p.Adj     |
| IRAK3                      | -4,31084    | -2,10797        | 4,69E-07  | 0,0000361 |
| KLRG2                      | -3,99687    | -1,99887        | 0,002384  | 0,009989  |
| C5                         | -3,96585    | -1,98763        | 0,000271  | 0,002199  |
| TNFSF15                    | -3,76918    | -1,91425        | 0,0000151 | 0,000295  |
| IL15                       | -3,59437    | -1,84574        | 0,0000603 | 0,000845  |
| LILRA3                     | -3,33852    | -1,73921        | 0,00076   | 0,004499  |
| LILRA5                     | -3,22212    | -1,68801        | 0,0000278 | 0,000503  |
| FCGR2A/C                   | -3,14459    | -1,65287        | 0,000354  | 0,002598  |
| HGF                        | -2,98912    | -1,57972        | 0,001558  | 0,007624  |
| FCGR3A/B                   | -2,87438    | -1,52325        | 0,00127   | 0,006744  |
| TAL1                       | -2,80272    | -1,48683        | 0,001713  | 0,007873  |
| TNFRSF17                   | -2,78887    | -1,47968        | 0,000659  | 0,004319  |
| NCAM1                      | -2,78286    | -1,47657        | 0,002771  | 0,010747  |
| XCR1                       | -2,74697    | -1,45784        | 0,000538  | 0,003834  |
| NFATC3                     | -2,74151    | -1,45497        | 0,001538  | 0,007624  |
| TRAF6                      | -2,59059    | -1,37328        | 0,000165  | 0,001539  |
| GZMB                       | -2,55574    | -1,35374        | 0,001979  | 0,008833  |
| PTGS2                      | -2,55556    | -1,35364        | 0,00481   | 0,015929  |
| LILRB1                     | -2,54601    | -1,34824        | 0,008265  | 0,023571  |
| LTA                        | -2,46882    | -1,30382        | 0,000147  | 0,001539  |
| C14orf166                  | -2,44665    | -1,29081        | 0,000155  | 0,001539  |
| CD163                      | -2,39283    | -1,25872        | 0,004302  | 0,014561  |
| CD274                      | -2,314      | -1,21039        | 0,000726  | 0,004499  |
| KCNJ2                      | -2,28351    | -1,19125        | 0,004229  | 0,014472  |
| PSMB7                      | -2,25538    | -1,17337        | 0,0000706 | 0,000906  |
| CD1A                       | -2,23991    | -1,16344        | 0,009853  | 0,026161  |
| C6                         | -2,23485    | -1,16018        | 0,008411  | 0,023766  |
| ICOS                       | -2,21352    | -1,14634        | 0,002457  | 0,009989  |
| PSMB5                      | -2,21335    | -1,14623        | 0,005882  | 0,018873  |
| TNFSF4                     | -2,20866    | -1,14317        | 0,006186  | 0,019643  |
| TLR1                       | -2,16715    | -1,1158         | 0,002633  | 0,010397  |
| TNFSF13B                   | -2,16174    | -1,11219        | 0,011531  | 0,029597  |
| NOD2                       | -2,15453    | -1,10737        | 0,001526  | 0,007624  |
| LILRB2                     | -2,1477     | -1,10279        | 0,001507  | 0,007624  |

|        |          |           |          |          |
|--------|----------|-----------|----------|----------|
| CLEC4E | -2,1319  | -1,09214  | 0,008218 | 0,023571 |
| MAPK11 | -2,08289 | -1,05859  | 0,001135 | 0,006245 |
| CASP1  | -2,07393 | -1,05237  | 0,002873 | 0,010923 |
| NOD1   | -2,06394 | -1,0454   | 0,009071 | 0,024945 |
| ITGAM  | -2,03689 | -1,02637  | 0,003519 | 0,013057 |
| IL21   | -2,03094 | -1,02215  | 0,009398 | 0,02539  |
| TLR4   | -1,95145 | -0,96455  | 0,018149 | 0,041715 |
| TICAM1 | -1,95019 | -0,963611 | 0,009602 | 0,025717 |
| IL18R1 | -1,93361 | -0,951296 | 0,020067 | 0,045113 |
| IL1R2  | -1,9309  | -0,949274 | 0,012434 | 0,0312   |
| LILRA6 | -1,92718 | -0,946491 | 0,00649  | 0,019989 |
| CD28   | -1,9257  | -0,945386 | 0,005597 | 0,018146 |
| IL1RAP | -1,91036 | -0,933842 | 0,007243 | 0,021872 |
| CR1    | -1,88689 | -0,91601  | 0,002014 | 0,008864 |
| MYD88  | -1,8858  | -0,915179 | 0,000758 | 0,004499 |
| IL7R   | -1,84346 | -0,88242  | 0,019891 | 0,045048 |
| ATG10  | -1,75647 | -0,812682 | 0,008796 | 0,024406 |
| CD48   | -1,71236 | -0,775986 | 0,009369 | 0,02539  |
| SLAMF7 | -1,62172 | -0,697527 | 0,018004 | 0,041694 |
| TLR2   | -1,5894  | -0,668481 | 0,012828 | 0,031357 |
| STAT4  | -1,58875 | -0,667892 | 0,010343 | 0,027221 |

Global relapse signature

| Genes     | Fold.Change | Log.Fold.Change | p.Value  | p.Adj    |
|-----------|-------------|-----------------|----------|----------|
| CXCR3     | 1,65214     | 0,724334        | 0,017763 | 0,041663 |
| LITAF     | 1,85276     | 0,889676        | 0,013421 | 0,032044 |
| TRAF1     | 1,86585     | 0,899833        | 0,011768 | 0,029954 |
| CLEC4A    | 1,88134     | 0,911762        | 0,012628 | 0,031317 |
| CCL5      | 1,90041     | 0,926307        | 0,008242 | 0,023571 |
| CD3E      | 1,91234     | 0,935338        | 0,013295 | 0,031992 |
| ARHGDIB   | 1,94414     | 0,959132        | 0,004659 | 0,015599 |
| STAT3     | 1,94735     | 0,961515        | 0,002314 | 0,009897 |
| CD8A      | 1,95426     | 0,966626        | 0,000213 | 0,00187  |
| STAT6     | 2,05777     | 1,04108         | 0,000036 | 0,000555 |
| PSMB9     | 2,07189     | 1,05095         | 0,000297 | 0,002285 |
| HLA-DMA   | 2,08414     | 1,05945         | 0,001132 | 0,006245 |
| ZAP70     | 2,09087     | 1,0641          | 0,019377 | 0,044208 |
| CD82      | 2,09324     | 1,06574         | 0,01313  | 0,031844 |
| B2M       | 2,10466     | 1,07359         | 0,008703 | 0,024368 |
| BST2      | 2,14044     | 1,09791         | 0,007654 | 0,022667 |
| IRF8      | 2,16066     | 1,11147         | 0,007573 | 0,022646 |
| CYBB      | 2,16424     | 1,11386         | 0,000845 | 0,004822 |
| IFI16     | 2,1874      | 1,12922         | 0,002465 | 0,009989 |
| ITGAL     | 2,19082     | 1,13147         | 0,003619 | 0,01327  |
| PTPRC_all | 2,20745     | 1,14238         | 0,00633  | 0,019694 |
| SOCS3     | 2,27609     | 1,18656         | 0,004131 | 0,014425 |
| FCGRT     | 2,39144     | 1,25788         | 0,00262  | 0,010397 |
| CCL19     | 2,44056     | 1,28721         | 0,005347 | 0,01752  |
| ITGB2     | 2,45668     | 1,29671         | 0,00156  | 0,007624 |
| CD34      | 2,47997     | 1,31032         | 0,01246  | 0,0312   |
| TNFRSF8   | 2,48198     | 1,31149         | 0,004136 | 0,014425 |
| CD3D      | 2,48437     | 1,31288         | 0,001693 | 0,007873 |
| HLA-DRA   | 2,53905     | 1,34429         | 0,011312 | 0,029277 |
| TGFB1     | 2,55319     | 1,3523          | 0,001635 | 0,007869 |
| C7        | 2,55693     | 1,35441         | 0,010429 | 0,027221 |
| NCF4      | 2,60684     | 1,3823          | 0,002791 | 0,010747 |

|          |         |         |            |           |
|----------|---------|---------|------------|-----------|
| IRF4     | 2,69322 | 1,42933 | 0,000253   | 0,00211   |
| CD4      | 2,77783 | 1,47396 | 0,001691   | 0,007873  |
| TAPBP    | 2,78535 | 1,47786 | 0,000163   | 0,001539  |
| IFI35    | 2,8051  | 1,48805 | 0,001234   | 0,00667   |
| IKZF3    | 2,86185 | 1,51695 | 0,000796   | 0,004628  |
| GBP5     | 2,86642 | 1,51925 | 0,000631   | 0,004224  |
| RELA     | 2,91311 | 1,54256 | 0,000615   | 0,00421   |
| LAG3     | 2,91727 | 1,54462 | 0,003908   | 0,013995  |
| EBI3     | 2,9868  | 1,5786  | 0,001837   | 0,008323  |
| C1QBP    | 2,99621 | 1,58314 | 0,000548   | 0,003834  |
| CD81     | 2,99638 | 1,58322 | 0,007225   | 0,021872  |
| CD99     | 2,99719 | 1,58361 | 0,0000932  | 0,001104  |
| LTBR     | 3,00083 | 1,58536 | 0,000759   | 0,004499  |
| JAK3     | 3,07134 | 1,61887 | 0,00222    | 0,009631  |
| CD79B    | 3,09337 | 1,62918 | 0,000288   | 0,002272  |
| IKBKAP   | 3,15325 | 1,65684 | 0,000354   | 0,002598  |
| BCL3     | 3,16944 | 1,66423 | 0,000148   | 0,001539  |
| PSMB10   | 3,32771 | 1,73453 | 0,000238   | 0,002037  |
| BATF     | 3,49449 | 1,80508 | 0,000164   | 0,001539  |
| CD74     | 3,49858 | 1,80677 | 0,0000112  | 0,000295  |
| CFD      | 3,59066 | 1,84425 | 0,000203   | 0,001835  |
| HLA-DRB1 | 3,59564 | 1,84625 | 0,004168   | 0,014425  |
| IL32     | 3,65414 | 1,86953 | 0,0000641  | 0,000859  |
| PML      | 3,70949 | 1,89122 | 0,0000319  | 0,000522  |
| TNFAIP3  | 4,00211 | 2,00076 | 0,0000119  | 0,000295  |
| CD79A    | 4,22438 | 2,07874 | 0,000105   | 0,0012    |
| BCAP31   | 4,43198 | 2,14795 | 0,01271    | 0,031317  |
| NFKBIA   | 4,50176 | 2,17049 | 0,0000153  | 0,000295  |
| FCER1G   | 4,57271 | 2,19305 | 0,0000526  | 0,000771  |
| IRF3     | 4,96058 | 2,31051 | 0,0000322  | 0,000522  |
| CD7      | 4,9715  | 2,31368 | 0,017246   | 0,04086   |
| LY96     | 4,98962 | 2,31893 | 0,0000133  | 0,000295  |
| PTPN2    | 5,50324 | 2,46028 | 0,00000131 | 0,00007   |
| HLA-C    | 5,56322 | 2,47592 | 0,00000156 | 0,00007   |
| CD14     | 5,70944 | 2,51335 | 0,00000451 | 0,000139  |
| APP      | 5,72518 | 2,51732 | 0,000015   | 0,000295  |
| CXCL13   | 5,77544 | 2,52993 | 0,0000779  | 0,00096   |
| HLA-B    | 6,27715 | 2,65011 | 3,52E-08   | 0,0000108 |
| FYN      | 6,51006 | 2,70267 | 0,003172   | 0,011915  |
| TNFRSF1B | 6,8403  | 2,77406 | 0,002404   | 0,009989  |
| TGFBI    | 7,01873 | 2,81121 | 0,0000031  | 0,000114  |
| TNFSF12  | 7,75706 | 2,95551 | 0,00000159 | 0,00007   |
| CD45R0   | 8,06039 | 3,01085 | 0,006291   | 0,019694  |
| TMEM173  | 8,32846 | 3,05805 | 3,33E-07   | 0,0000342 |
| MS4A1    | 8,42023 | 3,07386 | 0,00000334 | 0,000114  |
| HLA-A    | 8,73053 | 3,12607 | 1,15E-07   | 0,0000176 |
| LGALS1   | 10,6086 | 3,40716 | 0,000733   | 0,004499  |

**Table S3.** Differentially expressed genes at relapse compared to paired diagnostic samples of nodular sclerosis classical Hodgkin lymphoma patients.

| Up and down regulated genes at relapse in the nodular sclerosis subtype. |             |                 |            |          |
|--------------------------------------------------------------------------|-------------|-----------------|------------|----------|
| genes                                                                    | Fold.Change | Log.Fold.Change | p.Value    | p.Adj    |
| TNFSF15                                                                  | -9,51761    | -3,2506         | 0,00000442 | 0,000136 |
| IRAK3                                                                    | -7,53423    | -2,91346        | 0,00000561 | 0,000157 |

|           |          |           |            |           |
|-----------|----------|-----------|------------|-----------|
| LILRB2    | -6,02153 | -2,59013  | 0,00000166 | 0,0000598 |
| C5        | -6,00548 | -2,58628  | 0,004454   | 0,017142  |
| LILRA5    | -5,82105 | -2,54128  | 0,0000674  | 0,000988  |
| TAL1      | -5,62175 | -2,49102  | 0,001574   | 0,008505  |
| IL1R2     | -5,50228 | -2,46003  | 0,0000713  | 0,000998  |
| IL15      | -5,4402  | -2,44366  | 0,001712   | 0,008939  |
| HGF       | -5,29382 | -2,40431  | 0,003355   | 0,014353  |
| PTGS2     | -5,20605 | -2,38019  | 0,001011   | 0,006104  |
| NCAM1     | -5,06756 | -2,34129  | 0,006633   | 0,023481  |
| LTA       | -4,7406  | -2,24507  | 0,0000127  | 0,000245  |
| CD1A      | -4,66795 | -2,22279  | 0,002065   | 0,010098  |
| FCGR2A/C  | -4,20277 | -2,07134  | 0,002656   | 0,012211  |
| GZMB      | -4,18895 | -2,06659  | 0,002452   | 0,011444  |
| KCNJ2     | -4,15783 | -2,05583  | 0,001413   | 0,007773  |
| TNFRSF17  | -4,02405 | -2,00865  | 0,00379    | 0,015484  |
| TNFSF4    | -3,99128 | -1,99685  | 0,004133   | 0,01632   |
| C6        | -3,98633 | -1,99506  | 0,005777   | 0,021181  |
| FCGR3A/B  | -3,98602 | -1,99495  | 0,00609    | 0,022068  |
| ABCB1     | -3,93136 | -1,97503  | 0,004748   | 0,017621  |
| CD274     | -3,7341  | -1,90076  | 0,000688   | 0,004712  |
| IL1RAP    | -3,71263 | -1,89244  | 0,00098    | 0,006104  |
| TRAF6     | -3,56435 | -1,83364  | 0,001264   | 0,007209  |
| CD163     | -3,46227 | -1,79172  | 0,010075   | 0,031666  |
| XCR1      | -3,46208 | -1,79164  | 0,013124   | 0,037362  |
| C14orf166 | -3,29816 | -1,72166  | 0,000913   | 0,00598   |
| MME       | -3,28388 | -1,7154   | 0,016376   | 0,043859  |
| IL18R1    | -3,20095 | -1,6785   | 0,008537   | 0,028226  |
| PSMB7     | -3,0902  | -1,6277   | 0,00029    | 0,002627  |
| MAPK11    | -3,07627 | -1,62118  | 0,001841   | 0,009359  |
| CCR5      | -2,96286 | -1,56699  | 0,008663   | 0,028226  |
| GZMA      | -2,93628 | -1,55399  | 0,004508   | 0,017142  |
| CD276     | -2,93618 | -1,55394  | 0,011137   | 0,034093  |
| CASP3     | -2,91851 | -1,54523  | 0,006563   | 0,023481  |
| TICAM1    | -2,85255 | -1,51225  | 0,011751   | 0,034519  |
| ICOS      | -2,82431 | -1,4979   | 0,01188    | 0,034519  |
| MALT1     | -2,66469 | -1,41397  | 0,018631   | 0,04863   |
| SLAMF7    | -2,53336 | -1,34105  | 0,003057   | 0,013369  |
| CASP1     | -2,45973 | -1,2985   | 0,013614   | 0,038118  |
| TLR1      | -2,44871 | -1,29202  | 0,018338   | 0,048274  |
| NOD2      | -2,40127 | -1,2638   | 0,01634    | 0,043859  |
| MYD88     | -2,22026 | -1,15073  | 0,003617   | 0,015056  |
| CHUK      | -1,94858 | -0,962426 | 0,000951   | 0,006104  |
| MAPK14    | 1,88933  | 0,917874  | 0,008706   | 0,028226  |
| PSMB9     | 2,23803  | 1,16223   | 0,010749   | 0,033441  |
| STAT6     | 2,45654  | 1,29663   | 0,000906   | 0,00598   |
| IFI16     | 2,54561  | 1,34801   | 0,016745   | 0,044462  |
| STAT3     | 2,63051  | 1,39534   | 0,002811   | 0,012734  |
| LITAF     | 2,70079  | 1,43338   | 0,008274   | 0,027699  |
| CRADD     | 2,78947  | 1,47999   | 0,011492   | 0,034504  |
| HLA-DMA   | 2,80761  | 1,48934   | 0,002242   | 0,010788  |
| TGFBR2    | 2,81565  | 1,49347   | 0,01118    | 0,034093  |
| CD3D      | 2,89933  | 1,53572   | 0,015962   | 0,043506  |
| IRF8      | 3,0282   | 1,59846   | 0,014481   | 0,039822  |
| CD3E      | 3,06522  | 1,61599   | 0,004584   | 0,017219  |
| PTPRC_all | 3,18358  | 1,67065   | 0,011539   | 0,034504  |
| CLEC4A    | 3,21188  | 1,68342   | 0,002296   | 0,010879  |

|         |         |         |            |           |
|---------|---------|---------|------------|-----------|
| ZAP70   | 3,38257 | 1,75812 | 0,013222   | 0,037362  |
| CD82    | 3,38295 | 1,75828 | 0,009337   | 0,02965   |
| CCL7    | 3,43517 | 1,78038 | 0,01179    | 0,034519  |
| C1QBP   | 3,44891 | 1,78614 | 0,008019   | 0,027142  |
| ITGAL   | 3,46175 | 1,7915  | 0,003849   | 0,015484  |
| TRAF1   | 3,47902 | 1,79868 | 0,001938   | 0,00963   |
| CYBB    | 3,52289 | 1,81676 | 0,00109    | 0,006435  |
| FCGRT   | 3,59236 | 1,84493 | 0,003082   | 0,013369  |
| IKZF3   | 3,62103 | 1,8564  | 0,00777    | 0,02659   |
| B2M     | 3,97711 | 1,99172 | 0,002938   | 0,013114  |
| CCL19   | 4,01019 | 2,00367 | 0,003871   | 0,015484  |
| NCF4    | 4,01403 | 2,00505 | 0,004278   | 0,01668   |
| STAT1   | 4,12373 | 2,04395 | 0,000574   | 0,004113  |
| IRF4    | 4,31862 | 2,11057 | 0,000338   | 0,002827  |
| TAPBP   | 4,32629 | 2,11313 | 0,00034    | 0,002827  |
| TGFB1   | 4,34104 | 2,11804 | 0,001342   | 0,007513  |
| CFD     | 4,39103 | 2,13456 | 0,006989   | 0,024186  |
| SOCS3   | 4,45035 | 2,15392 | 0,001107   | 0,006435  |
| PSMB10  | 4,47833 | 2,16296 | 0,001693   | 0,008939  |
| CD99    | 4,80918 | 2,26579 | 0,000136   | 0,001513  |
| MIF     | 4,93226 | 2,30225 | 0,009338   | 0,02965   |
| IFI35   | 5,24932 | 2,39213 | 0,001854   | 0,009359  |
| TNFRSF4 | 5,34156 | 2,41726 | 0,003443   | 0,014525  |
| TNFAIP3 | 5,41173 | 2,43609 | 0,00042    | 0,003384  |
| PML     | 5,62526 | 2,49192 | 0,000136   | 0,001513  |
| RELA    | 5,80055 | 2,53619 | 0,000642   | 0,004496  |
| NOTCH2  | 5,84714 | 2,54773 | 0,006747   | 0,023615  |
| EBI3    | 5,98512 | 2,58138 | 0,001006   | 0,006104  |
| LTBR    | 6,00815 | 2,58692 | 0,000319   | 0,002811  |
| TNFRSF8 | 6,02024 | 2,58982 | 0,000429   | 0,003384  |
| CD4     | 6,12237 | 2,61409 | 0,000253   | 0,002359  |
| GBP5    | 6,23098 | 2,63946 | 0,00011    | 0,001357  |
| CD79B   | 6,37524 | 2,67248 | 0,00021    | 0,00202   |
| ITGB2   | 6,41967 | 2,6825  | 0,0000994  | 0,001275  |
| CD74    | 6,45197 | 2,68974 | 0,00000737 | 0,000159  |
| NFKBIA  | 7,07956 | 2,82366 | 0,00045    | 0,003384  |
| BATF    | 7,09258 | 2,82631 | 0,000142   | 0,001513  |
| BCAP31  | 7,3403  | 2,87584 | 0,000169   | 0,001674  |
| BCL3    | 7,82402 | 2,96791 | 0,00000654 | 0,000158  |
| HLA-DRA | 8,01321 | 3,00238 | 0,000445   | 0,003384  |
| JAK3    | 8,30834 | 3,05456 | 0,000552   | 0,00405   |
| IKBKAP  | 8,6187  | 3,10747 | 0,0000341  | 0,000554  |
| CD79A   | 9,08345 | 3,18324 | 0,000155   | 0,001594  |
| CD14    | 9,95506 | 3,31543 | 0,0000403  | 0,000621  |
| HLA-A   | 10,1512 | 3,34358 | 0,013215   | 0,037362  |
| FCER1G  | 10,3586 | 3,37276 | 0,0000822  | 0,001101  |
| LY96    | 11,4447 | 3,51661 | 0,0000262  | 0,000448  |
| APP     | 12,0658 | 3,59285 | 0,00014    | 0,001513  |
| HLA-B   | 12,1013 | 3,59709 | 3,19E-07   | 0,000019  |
| MS4A1   | 12,929  | 3,69254 | 0,014332   | 0,039767  |
| HLA-C   | 13,652  | 3,77104 | 4,27E-07   | 0,000019  |
| CD7     | 14,0721 | 3,81477 | 0,0000146  | 0,000264  |
| PTPN2   | 16,6213 | 4,05496 | 1,06E-07   | 0,0000163 |
| TNFSF12 | 16,7178 | 4,06331 | 0,00000776 | 0,000159  |
| IRF3    | 18,9141 | 4,24139 | 0,00000175 | 0,0000598 |
| FYN     | 20,0892 | 4,32835 | 1,05E-07   | 0,0000163 |

|          |         |         |            |          |
|----------|---------|---------|------------|----------|
| TGFB1    | 21,5955 | 4,43266 | 0,00000666 | 0,000158 |
| TNFRSF1B | 24,0544 | 4,58823 | 4,32E-07   | 0,000019 |
| TMEM173  | 25,5895 | 4,67748 | 3,23E-07   | 0,000019 |
| LGALS1   | 36,1913 | 5,17757 | 2,68E-07   | 0,000019 |

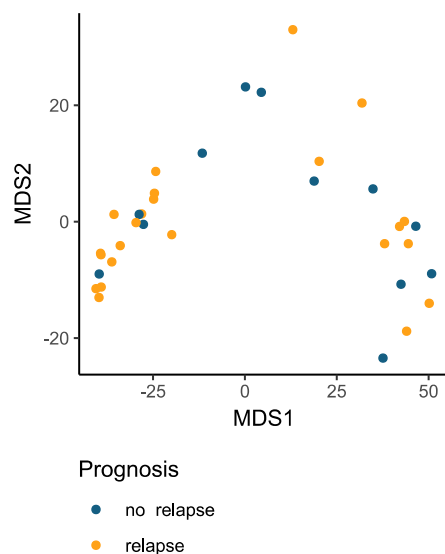

**Figure S1.** Unsupervised samples mapping is not driven by outcomes. Multidimensional scaling (MDS) plots of diagnostic biopsies (n=35) based on the Immunology V2 Nanostring panel gene expression.

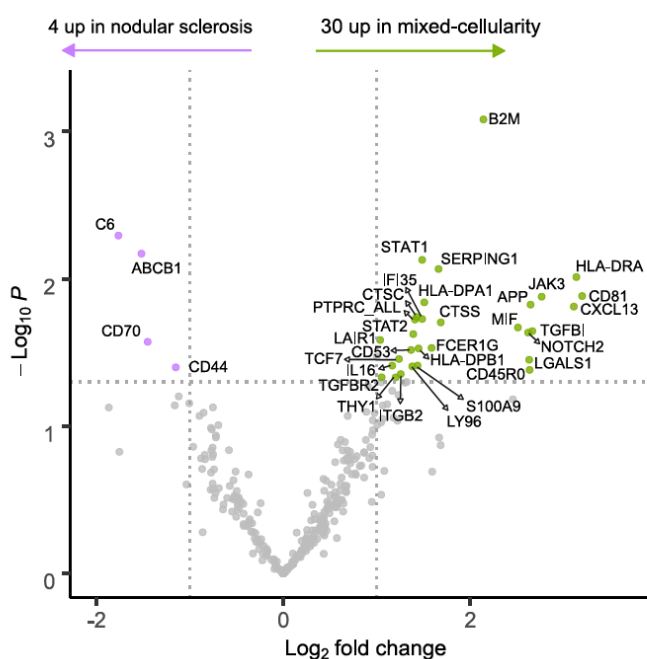

**Figure S2.** Differential gene expression analysis identifies specific immune signatures at diagnosis according to the mixed-cellularity and the nodular sclerosis subtypes, all outcomes combined. Volcano plot displaying differentially expressed genes at diagnosis between the nodular sclerosis and the mixed-cellularity subtypes. Genes significantly deregulated ( $p < 0.05$  and  $|\text{fold change}| > 2$ ) are highlighted in purple (upregulated in the nodular sclerosis subtype, n=4) or green (upregulated in the mixed-cellularity subtype, n=30).



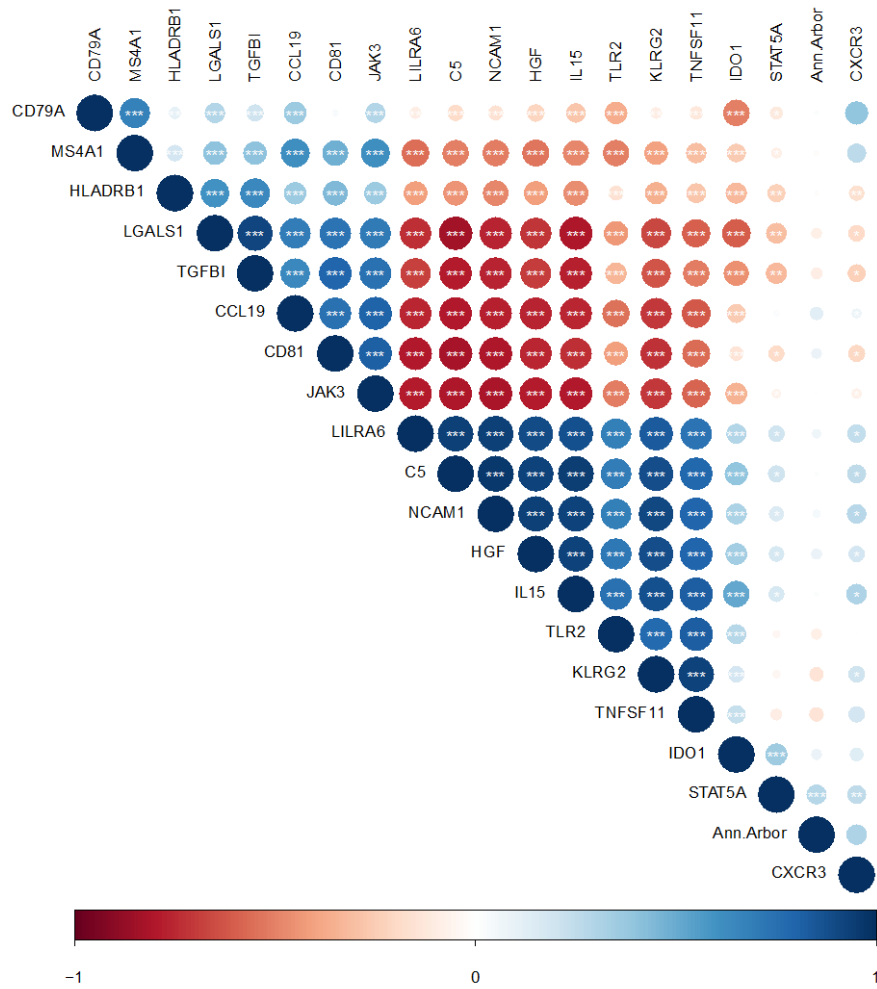

**Figure S3.** Correlation matrix showing the interrelationship between the gene expression levels of the immune prognostic signature and the Ann Arbor stage. Spearman correlation performed. Samples are ordered by hierarchical clustering, negative correlations are displayed in red and positive correlations in blue. \*\*\* p < 0.001, \*\* p < 0.01, \* p < 0.05
